# Supplementary material for: Impact of [18F]FDG-PET and [18F]FLT-PET-Parameters in Patients with Suspected Relapse of Irradiated Lung Cancer
Source: MDPI journal article supplement (doi:10.3390/diagnostics11020279), 2021-02-11
Supplement: s1 [file s1]

**Supplemental Table S1** Data on PET model and reconstruction used for FDG-PET/CT

| Hospital            | PET manufacturer        | PET model                   | Reconstruction method | Beta, or iterations and subsets | Postreconstruction filter (FWHM) | No of patients |
|---------------------|-------------------------|-----------------------------|-----------------------|---------------------------------|----------------------------------|----------------|
| Bispebjerg Hospital | GE Medical Systems      | Discovery 710               | QCFX                  | $\beta=500$                     | -                                | 4              |
|                     |                         | Discovery MI                | QCFX                  | $\beta=500$                     | -                                | 1              |
|                     | Philips Medical Systems | GEMINI TF 64                | BLOB-OS-TF            | 3i33s                           | $\lambda=1$                      | 4              |
| Herlev Hospital     | Siemens                 | Biograph mCT 64             | OSEM PSF+TOF          | 4i21s                           | 2.5 mm                           | 1              |
| Rigshospitalet      | Siemens                 | Biograph mCT 64             | OSEM PSF+TOF          | 2i21s                           | 2.0 mm                           | 20             |
|                     |                         |                             | OSEM PSF+TOF          | 2i21s                           | 2.5 mm                           | 1              |
|                     |                         |                             | OSEM PSF              | 3i21s                           | 2 mm                             | 14             |
|                     |                         | Biograph TruePoint TrueV 40 | OSEM PSF              | 3i21s                           | 2.5 mm                           | 1              |
|                     |                         | Biograph TruePoint TrueV 64 | OSEM PSF              | 3i21s                           | 2.0 mm                           | 14             |
|                     |                         |                             | OSEM PSF              | 3i21s                           | 2.5 mm                           | 1              |

FDG-PET/CT: 2-deoxy-2-[ $^{18}\text{F}$ ]fluoro-D-glucose-PET/CT; QCFX: QClear with PFS and filtering; BLOB-OS-TF: OSEM with blobs and TOF; OSEM: Ordered subset expectation maximization; PSF: point spread function; TOF: time of flight; I: iterations; S: subsets

**Supplemental Table S2** PET-parameters in intrapulmonary malignant lesions in patients with NSCLC

| FDG-PET-parameters        | All lesions median [IQ] ( <i>n</i> = 28) | Within HDV median [IQ] ( <i>n</i> = 15) | Outside of HDV median [IQ] ( <i>n</i> = 13) | <i>p</i> -value |
|---------------------------|------------------------------------------|-----------------------------------------|---------------------------------------------|-----------------|
| SUV <sub>max</sub>        | 10.6 [5.1-16.1]                          | 13.0 [6.8-16.3]                         | 7.2 [4.1-14.5]                              | 0.106           |
| SUV <sub>peak</sub>       | 5.0 [3.2-9.1]                            | 8.2 [4.3-10.0]                          | 3.9 [2.3-6.2]                               | 0.017*          |
| MTV <sub>3.0</sub>        | 1.8 [0.6-11.8]                           | 6.6 [1.6-52.2]                          | 1.2 [0.2-2.2]                               | 0.017*          |
| MTV <sub>80%</sub>        | 0.1 [0.1-0.5]                            | 0.2 [0.1-0.6]                           | 0.1 [0.1-0.1]                               | 0.112           |
| MTV <sub>50%</sub>        | 1.2 [0.4-3.9]                            | 2.5 [1.2-7.9]                           | 0.6 [0.4-1.2]                               | 0.014*          |
| <b>FLT-PET-parameters</b> |                                          |                                         |                                             |                 |
| SUV <sub>max</sub>        | 3.8 [2.0-5.1]                            | 3.9 [2.4-5.9]                           | 3.6 [1.5-3.1]                               | 0.235           |
| SUV <sub>peak</sub>       | 2.4 [1.4-3.4]                            | 2.6 [1.5-3.5]                           | 2.2 [1.1-3.1]                               | 0.194           |
| PTV <sub>3.0</sub>        | 0.2 [0.0-2.0]                            | 0.3 [0.0-4.5]                           | 0.1 [0.0-0.5]                               | 0.128           |
| PTV <sub>80%</sub>        | 0.2 [0.1-0.3]                            | 0.3 [0.1-0.5]                           | 0.1 [0.1-0.2]                               | 0.406           |
| PTV <sub>50%</sub>        | 1.3 [0.8-4.3]                            | 2.7 [0.8-10.1]                          | 1.2 [0.6-1.7]                               | 0.072           |

NSCLC: non-small cell lung cancer; HDV: high-dose irradiated volume (>50% of prescribed dose); IQ: interquartile range; SUV: standardized uptake value; MTV: metabolic tumour volume; PTV: proliferative tumour volume; \* Statistically significant.

**Supplemental Table S3** FDG-SUV<sub>max</sub> and FLT-SUV<sub>max</sub> in relapsed vs. non-relapsed HDV in patients with NSCLC

|                        | HDV with relapse<br>Mean ( <i>n</i> = 15) | HDV without relapse<br>Mean ( <i>n</i> = 42) | Mean difference | <i>p</i> -value |
|------------------------|-------------------------------------------|----------------------------------------------|-----------------|-----------------|
| FDG-SUV <sub>max</sub> | 12.0                                      | 4.8                                          | 7.2 [4.1-10.4]  | 0.0001*         |
| FLT-SUV <sub>max</sub> | 4.4                                       | 2.3                                          | 2.1 [0.7-3.5]   | 0.006*          |

SUV: standardized uptake value; HDV: high-dose irradiated volume (>50% of prescribed dose); NSCLC: non-small cell lung cancer; \* Statistically significant.

**Supplemental Table S4** Prognostic value of PET-parameters and clinical variables in patients with intrapulmonary relapse of irradiated NSCLC. Univariate survival analysis (*n* = 28)

| FDG-PET parameters in recurrent lesions, continuous variable     | Hazard ratio [95% CI] | <i>p</i> -value |
|------------------------------------------------------------------|-----------------------|-----------------|
| SUV <sub>max</sub> (pr unit)                                     | 1.00 [0.93-1.08]      | 0.962           |
| SUV <sub>peak</sub> (pr unit)                                    | 1.05 [0.92-1.19]      | 0.508           |
| MTV <sub>3.0</sub> (pr cm <sup>3</sup> )                         | 1.01 [0.99-1.02]      | 0.560           |
| MTV <sub>80%</sub> (pr cm <sup>3</sup> )                         | 3.51 [0.93-13.20]     | 0.064           |
| MTV <sub>50%</sub> (pr cm <sup>3</sup> )                         | 1.12 [0.99-1.26]      | 0.067           |
| FDG-PET parameters in recurrent lesions, dichotomized variable   |                       |                 |
| SUV <sub>max</sub> (> 10.6)                                      | 1.01 [0.40-2.56]      | 0.979           |
| SUV <sub>peak</sub> (> 4.9)                                      | 1.01 [0.40-2.56]      | 0.979           |
| MTV <sub>3.0</sub> (> 1.7 cm <sup>3</sup> )                      | 0.75 [0.29-1.91]      | 0.547           |
| MTV <sub>80%</sub> (> 0.1 cm <sup>3</sup> )                      | 1.58 [0.62-4.01]      | 0.340           |
| MTV <sub>50%</sub> (> 1.2 cm <sup>3</sup> )                      | 1.45 [0.57-3.70]      | 0.436           |
| FLT-PET parameters in recurrent lesions, continuous variable     |                       |                 |
| SUV <sub>max</sub> (pr unit)                                     | 0.90 [0.73-1.12]      | 0.340           |
| SUV <sub>peak</sub> (pr unit)                                    | 0.88 [0.62-1.26]      | 0.489           |
| PTV <sub>3.0</sub> (pr cm <sup>3</sup> )                         | 1.04 [0.92-1.17]      | 0.519           |
| PTV <sub>80%</sub> (pr cm <sup>3</sup> )                         | 3.72 [0.73-18.87]     | 0.113           |
| PTV <sub>50%</sub> (pr cm <sup>3</sup> )                         | 1.07 [1.01-1.13]      | 0.018*          |
| FLT-PET parameters in recurrent lesions, dichotomized variable   |                       |                 |
| SUV <sub>max</sub> (> 3.7)                                       | 0.69 [0.27-1.76]      | 0.435           |
| SUV <sub>peak</sub> (> 2.4)                                      | 0.82 [0.32-2.10]      | 0.684           |
| PTV <sub>3.0</sub> (> 0.2 cm <sup>3</sup> )                      | 0.68 [0.26-1.80]      | 0.438           |
| PTV <sub>80%</sub> (> 0.2 cm <sup>3</sup> )                      | 1.57 [0.62-4.02]      | 0.350           |
| PTV <sub>50%</sub> (> 1.3 cm <sup>3</sup> )                      | 1.31 [0.51-3.35]      | 0.570           |
| Clinical parameters                                              |                       |                 |
| Age (at suspicion) (pr year)                                     | 1.03 [0.96-1.10]      | 0.453           |
| Sex (male)                                                       | 2.80 [1.00-7.84]      | 0.050           |
| Stadium (III vs I-II)                                            | 1.15 [0.43-3.05]      | 0.779           |
| (IV vs I-II)                                                     | 0.54 [0.07-4.43]      | 0.567           |
| Radiotherapy (Conventionally fractionated radiotherapy vs. SBRT) | 1.28 [0.48-3.42]      | 0.625           |
| Histology (Squamous cell carcinoma vs. adenocarcinoma)           | 1.24 [0.48-3.20]      | 0.659           |

|                                                           |                   |       |
|-----------------------------------------------------------|-------------------|-------|
| Time since end of radiotherapy (pr month)                 | 0.98 [0.90-1.08]  | 0.726 |
| Site of relapse (within HDV vs. outside HDV)              | 1.54. [0.60-3.98] | 0.373 |
| Intention for relapse treatment (palliation vs. curative) | 1.30 [0.50-3.39]  | 0.593 |
| Extra-pulmonary metastases (present)                      | 1.96 [0.63-6.11]  | 0.245 |

SUV: standardized uptake value; MTV: metabolic tumour volume; PTV: proliferative tumour volume; SBRT: stereotactic body radiotherapy; HDV: high-dose irradiated volume (>50% of prescribed dose); \* Statistically significant.

**Supplemental Table S5** Multivariate survival analysis in patients with relapsed NSCLC ( $n = 28$ )

| Covariate                                 | Hazard ratio [95% CI] | <i>p</i> -value |
|-------------------------------------------|-----------------------|-----------------|
| MTV <sub>50%</sub> (pr cm <sup>3</sup> )  | 1.19 [0.98-1.44]      | 0.072           |
| PTV <sub>50%</sub> (pr cm <sup>3</sup> )  | 1.02 [0.95-1.09]      | 0.638           |
| Sex (male)                                | 4.17 [1.28-13.56]     | 0.018*          |
| Age (at suspicion) (pr year)              | 1.08 [1.00-1.17]      | 0.065           |
| Time since end of radiotherapy (pr month) | 0.96 [0.88-1.05]      | 0.355           |

MTV: metabolic tumour volume; PTV: proliferative tumour volume; \* Statistically significant.
